# Supplementary material
Source: publisher figshare collection journal article supplement (https://acs.figshare.com/ndownloader/files/25314200)
Supplement: Supplementary file 1 [file 25314200]

Supplementary materials for

**Comparative Metagenomic and Metatranscriptomic Analyses Reveal  
the Functional Species and Metabolic Characteristics of an Enriched  
Denitratation Community**

**Zhengzhe Zhang<sup>#</sup>, Yu Zhang<sup>#</sup>, Yinguang Chen<sup>\*</sup>**

*State Key Laboratory of Pollution Control and Resources Reuse, School of*

*Environmental Science and Engineering, Tongji University, 1239 Siping Road,*

*Shanghai 200092, China*

*<sup>#</sup>These authors contributed equally to this work*

\*Corresponding author

Tel.: 86-21-65981263

Fax: 86-21-65986313

E-mail: yinguangchen@tongji.edu.cn

**Number of pages: 12**

**Number of texts: 1**

**Number of tables: 4**

**Number of figures: 6**

**Text S1 Determination methods for the activities of nitrate reductase (NAR), nitrite reductase (NIR).**

Sludge samples were obtained from the reactor, and washed for 3 times with 0.01 M phosphate buffer (pH 7.4). Then, the resuspended pellets were sonicated at 20 kHz and 4 °C for 5 min to break down the cell structure of bacteria in sludge. The debris was centrifuged at 12,000 g and 4 °C for 10 min and the crude extracts in supernatant were obtained for the enzyme activity measurement. The NAR and NIR activities were determined by using the methyl viologen as the electron donor. A volume of 300 µL crude extracts was added to start the reaction in the cuvette containing 0.01 M phosphate buffer (pH 7.4), 1mM NaNO<sub>3</sub> or 1 mM NaNO<sub>2</sub>, 1mM methyl viologen and 5 mM sodium hyposulfite (Na<sub>2</sub>S<sub>2</sub>O<sub>4</sub>) in a final volume of 2 mL. The incubation was performed at 30 °C for 30 min, followed by measuring the increase of nitrite in NAR activity assay or the decrease of nitrite in NIR activity assay. The specific NAR and NIR activities were expressed as mgN h<sup>-1</sup> g<sup>-1</sup>protein. The activities of NirS and NirK were identified by adding diethyl dithio carbamate (10 mM).<sup>1</sup> Protein content was determined using the Lowry method with bovine serum albumin as standard.<sup>2</sup>

References:

1. Li, W.; Shan, X.; Wang, Z.; Lin, X.; Li, C.; Cai, C.; Abbas, G.; Zhang, M.; Shen, L.; Hu, Z.; Zhao, H.; Zheng, P., Effect of self-alkalization on nitrite accumulation in a high-rate denitrification system: Performance, microflora and enzymatic activities. *Water Res.* **2016**, *88*, 758-765.
2. Lowry, O. H.; Rosebrough, N. J.; Farr, A. L.; Randall, R. J., Protein measurement with the Folin phenol reagent. *J. Biol. Chem.* **1951**, *193*, 265-275.

**Table S1.** Operational parameters of the reactor at different phases.

| Phase | Time      | Inf.NH <sub>4</sub> <sup>+</sup> -N<br>(mg L <sup>-1</sup> ) | Inf.NO <sub>3</sub> <sup>-</sup> -N<br>(mg L <sup>-1</sup> ) | COD/NO <sub>3</sub> <sup>-</sup> -N | pH  | HRT<br>(h) | Cycle  | Nitrate Loading Rate<br>(kgN m <sup>-3</sup> d <sup>-1</sup> ) |
|-------|-----------|--------------------------------------------------------------|--------------------------------------------------------------|-------------------------------------|-----|------------|--------|----------------------------------------------------------------|
| 1     | 1 ~ 30    | 10                                                           | 30                                                           | 1.5                                 | 8.5 | 8.0        | 6      | 0.09                                                           |
| 2     | 31 ~ 80   | 10                                                           | 30                                                           | 2.5                                 | 8.5 | 6.0        | 8 → 12 | 0.12 → 0.18                                                    |
| 3     | 80 ~ 94   | 10                                                           | 30                                                           | 2.5                                 | 7.5 | 4.0        | 12     | 0.18                                                           |
| 4     | 95 ~ 210  | 10                                                           | 30 → 60                                                      | 2.8                                 | 8.0 | 4.0        | 12     | 0.18 - 0.37                                                    |
| 5     | 210 ~ 270 | 40                                                           | 60                                                           | 2.8                                 | 7.5 | 4.0        | 12     | 0.37                                                           |

**Table S2.** Experimental parameters in batch assays. Phosphate buffer (20 mM) was added to serum flasks to control the pH at 7.5, 8.0 and 8.5.

| Run | Sample | Nitrate<br>(mgN L <sup>-1</sup> ) | Nitrite<br>(mgN L <sup>-1</sup> ) | Acetate<br>(mgCOD L <sup>-1</sup> ) | pH  |
|-----|--------|-----------------------------------|-----------------------------------|-------------------------------------|-----|
| 1   | S0     | 60                                | 0                                 | 150                                 | 7.5 |
| 2   | S0     | 60                                | 0                                 | 150                                 | 8.0 |
| 3   | S0     | 60                                | 0                                 | 150                                 | 8.5 |
| 4   | S2     | 60                                | 0                                 | 150                                 | 7.5 |
| 5   | S2     | 60                                | 0                                 | 150                                 | 8.0 |
| 6   | S2     | 60                                | 0                                 | 150                                 | 8.5 |
| 7   | S3     | 60                                | 0                                 | 150                                 | 7.5 |
| 8   | S3     | 60                                | 0                                 | 150                                 | 8.0 |
| 9   | S3     | 60                                | 0                                 | 150                                 | 8.5 |
| 10  | S4_3   | 60                                | 0                                 | 150                                 | 7.5 |
| 11  | S4_3   | 60                                | 0                                 | 150                                 | 8.0 |
| 12  | S4_3   | 60                                | 0                                 | 150                                 | 8.5 |
| 13  | S4_3   | 0                                 | 60                                | 150                                 | 8.0 |
| 14  | S4_3   | 60                                | 60                                | 150                                 | 8.0 |
| 15  | S4_3   | 60                                | 0                                 | 300                                 | 8.0 |

**Table S3.** Alpha diversity indices of the eight samples.

| Sample | Ace    | Chao   | Shannon | Simpson | Coverage |
|--------|--------|--------|---------|---------|----------|
| S0_1   | 1245.1 | 1274.2 | 5.41    | 0.010   | 0.997    |
| S0_2   | 1158.3 | 1150.5 | 5.31    | 0.012   | 0.996    |
| S1     | 1205.7 | 1213.6 | 5.06    | 0.018   | 0.996    |
| S2     | 1014.5 | 1009.9 | 4.92    | 0.020   | 0.998    |
| S3     | 807.9  | 828.0  | 4.32    | 0.030   | 0.998    |
| S4_1   | 584.5  | 599.4  | 3.61    | 0.061   | 0.998    |
| S4_2   | 565.3  | 578.1  | 3.78    | 0.060   | 0.998    |
| S4_3   | 609.7  | 660.5  | 3.78    | 0.064   | 0.998    |
| S5     | 236.7  | 246.1  | 1.72    | 0.43    | 0.999    |

**Table S4.** Sequencing, assembly and annotation statistics. Reads containing one or more unknown nucleotides, reads containing bases with quality score lower than 20, or reads with length less than 50 bp were removed.

| Samples     | Clean reads | Percent in raw reads (%) | Clean base(bp) | Percent in raw bases (%) | Contigs   | Contigs bases(bp) | N50(bp) |
|-------------|-------------|--------------------------|----------------|--------------------------|-----------|-------------------|---------|
| S0          | 103,157,992 | 99.0                     | 15,538,457,467 | 98.8                     | 1,232,430 | 900,637,026       | 796     |
| S4_3        | 99,395,412  | 99.0                     | 14,984,206,676 | 98.8                     | 565,667   | 528,062,261       | 1263    |
| S4_3-feast  | 137,399,407 | 97.3                     | 20,529,800,548 | 97.3                     | 614,779   | 232,416,976       | 393     |
| S4_3-famine | 129,935,977 | 96.4                     | 19,435,421,817 | 96.4                     | 335,060   | 122,253,540       | 372     |

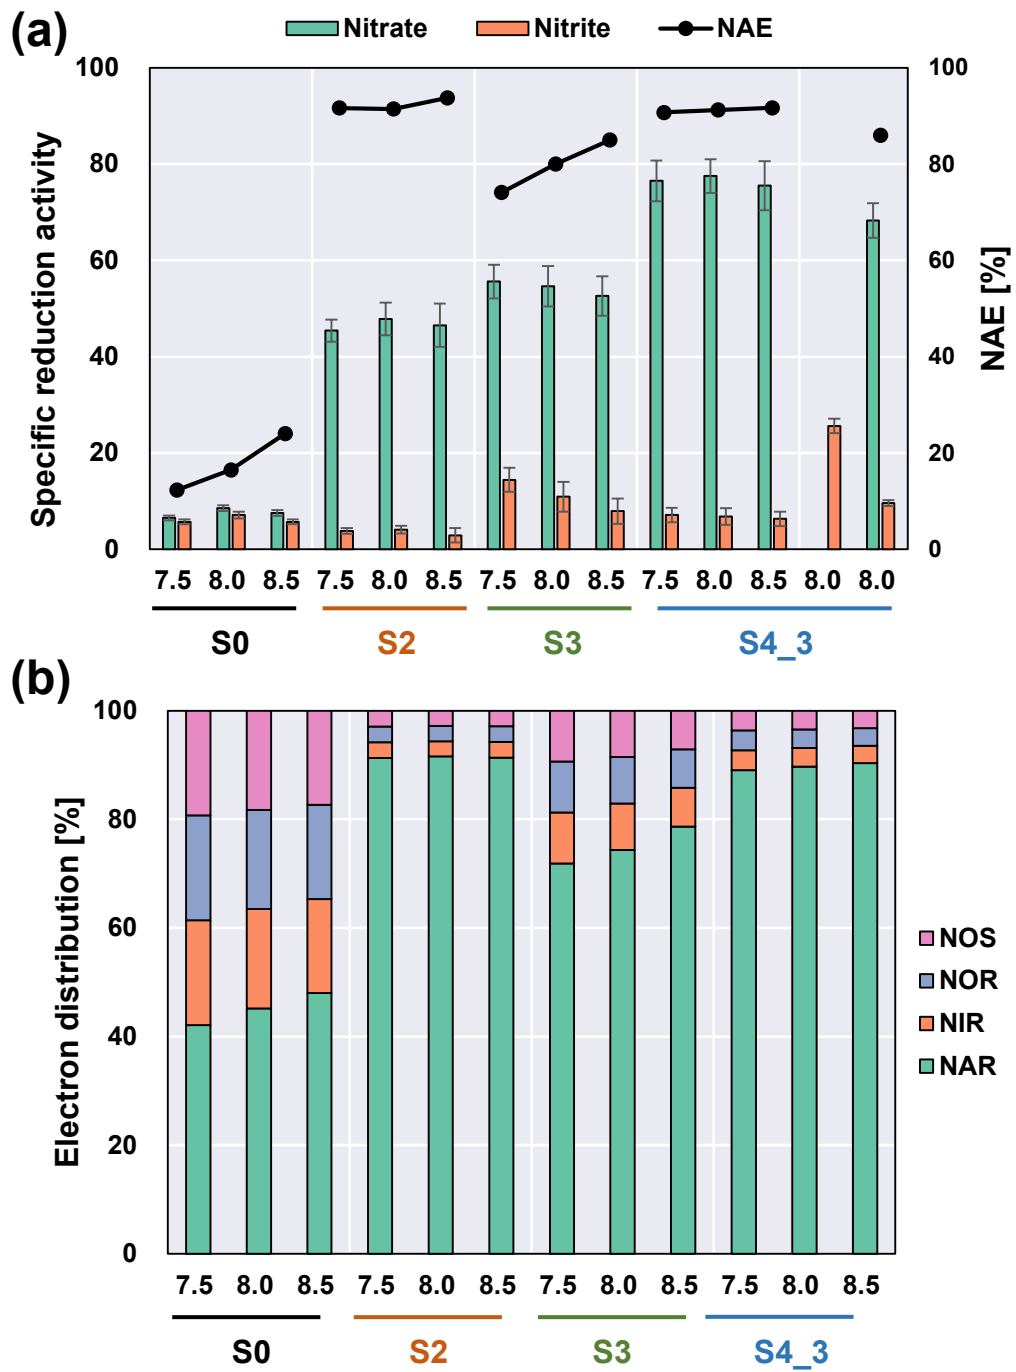

**Figure S1.** Effect of pH on the denitrification activity(a) and electron distribution (b) of various enrichments. NRE, nitrite accumulation efficiency, is defined as the ratio of nitrate reduction rate to nitrite reduction rate.

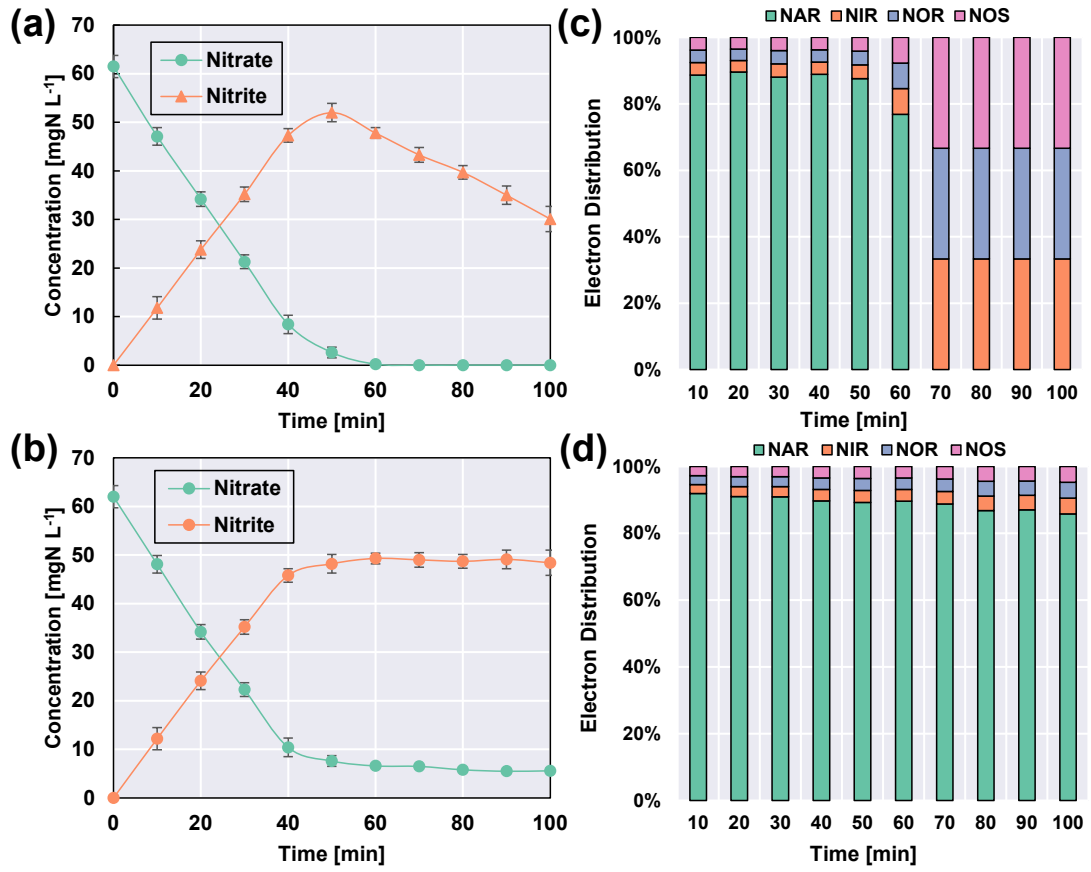

**Figure S2.** Time course of nitrate reduction and electron distribution of S4\_3 at the C/N ratio of 5.0 (a, c) or 2.5 (b, d) when the initial pH was 8.0.



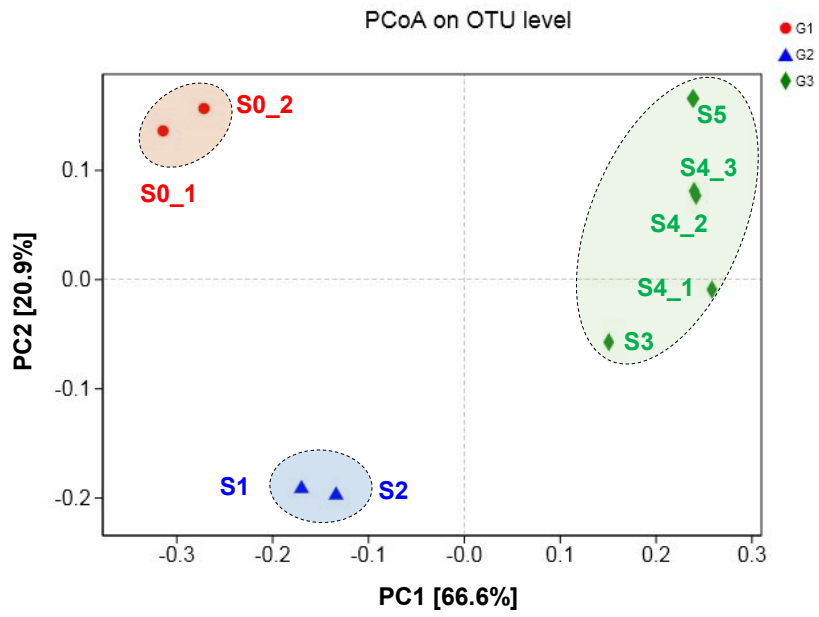

**Figure S3.** Principal coordinate analysis (PCoA) plot based on the Bray–Curtis distance metric illustrating the variability in samples throughout the enrichment process.

| Species                   | Feast | Famine | Change |
|---------------------------|-------|--------|--------|
| Flavobacterium columnare  | 157.8 | 319.9  | -162.1 |
| Sphingobacterium mizutaii | 56.0  | 82.6   | -26.6  |
| Marivirga tractuosa       | 40.4  | 72.1   | -31.7  |
| Flavobacterium johnsoniae | 42.7  | 60.3   | -17.6  |
| Thauera sp. MZ1T          | 132.5 | 52.2   | 80.3   |
| Pontibacter actiniarum    | 43.4  | 46.8   | -3.4   |
| Niastella koreensis       | 23.9  | 24.5   | -0.6   |
| Azospira oryzae           | 31.3  | 0.0    | 31.3   |
| Hymenobacter sp. DG25B    | 12.8  | 2.4    | 10.3   |
| Maribacter sp. HTCC2170   | 12.1  | 13.7   | -1.6   |

**Figure S4.** Taxonomic origins of nosZ transcripts (TPM: Trans Per Million) in the sample S4\_3 and transcriptional dynamics in the feast and famine phases as indicated by the change of color. (Only the TOP 10 transcripts were showed.)

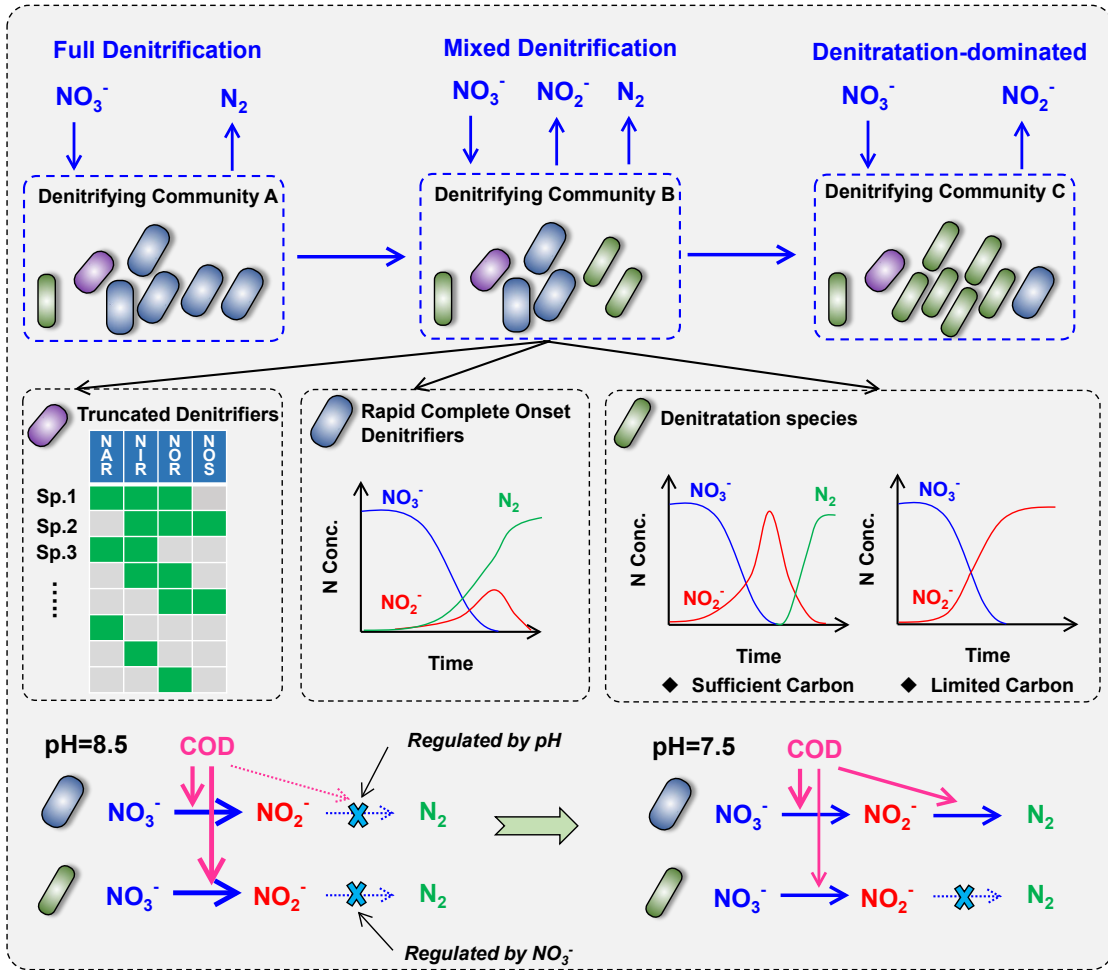

**Figure S5.** Proposed mechanisms for the achievement of denitratation.

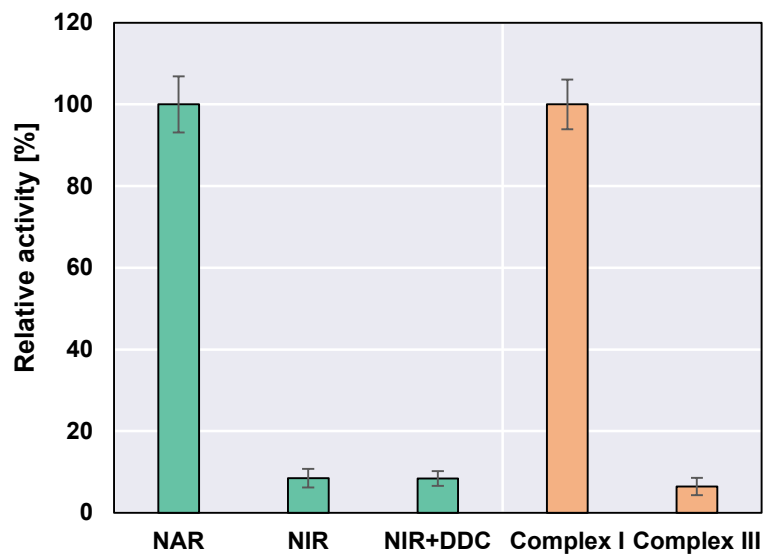

**Figure S6.** Relative activity of nitrate reductase (NAR), nitrite reductase (NIR) and their corresponding electron transport modules (Complex I and Complex III). The activities of NirS and NirK were identified by adding diethyl dithio carbamate (DDC).
